# Supplementary material
Source: HighWire-hosted journal article supplement (https://erj.ersjournals.com/content/55/3/1902243)
Supplement: inline-supplementary-material-1 [file inline-supplementary-material-1.pdf]

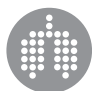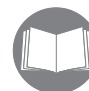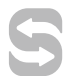

SHAREABLE PDF

# From pests to tests: training rats to diagnose tuberculosis

Lena Fiebig<sup>1,2</sup>, Negussie Beyene<sup>1,2,3</sup>, Robert Burny<sup>4</sup>, Cynthia D. Fast<sup>1</sup>,  
Christophe Cox<sup>1,2</sup> and Georgies F. Mgode<sup>1,5</sup>

**Affiliations:** <sup>1</sup>APOPO (Anti-Persoonsmijnen Ontmijnende Product Ontwikkeling; in English, Anti-Personnel Landmines Detection Product Development) Training and Research Centre, Sokoine University of Agriculture, Morogoro, Tanzania. <sup>2</sup>Dept of Biology, University of Antwerp, Antwerp, Belgium. <sup>3</sup>AHRI-APOPO TB Research Project, Armauer Hansen Research (AHRI) Institute, Addis Ababa, Ethiopia. <sup>4</sup>APOPO TB Project, University Eduardo Mondlane (UEM), Maputo, Mozambique. <sup>5</sup>Pest Management Centre, Africa Centre of Excellence for Innovative Rodent Pest Management and Biosensor Technology Development, Sokoine University of Agriculture, Morogoro, Tanzania.

**Correspondence:** Lena Fiebig, APOPO Training and Research Centre, Sokoine University of Agriculture, PO 3078, Morogoro, Tanzania. E-mail: lena.fiebig@apopo.org

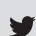

@ERSpublications

**It's time... to find and treat all patients with TB. Rats may have a say in research towards better diagnostic tests.** <http://bit.ly/2Ria9N>

**Cite this article as:** Fiebig L, Beyene N, Burny R, *et al.* From pests to tests: training rats to diagnose tuberculosis. *Eur Respir J* 2020; 55: 1902243 [<https://doi.org/10.1183/13993003.02243-2019>].

This single-page version can be shared freely online.

2020 is the year of the rat. The rat is the first of the 12 Chinese zodiac signs, and represents spirit, alertness, flexibility and vitality. In respiratory medicine, we may think of rats as vectors for diseases, such as pulmonary forms of hantavirus disease or leptospirosis, and pneumonic plague. Rodent control is thus part of hygiene guidelines and the International Health Regulations. And yet, the rat's keen sense of smell has led to its incredible career as a living tuberculosis (TB) detector.
